# Supplementary material for: Prostaglandin D2 amplifies lupus disease through basophil accumulation in lymphoid organs
Source: PubMed Central journal article supplement (PMC5820278; doi:10.1038/s41467-018-03129-8), 2018-02-20
Supplement: 41467_2018_3129_MOESM1_ESM.pdf [file 41467_2018_3129_MOESM1_ESM.pdf]

## SUPPLEMENTARY INFORMATION

### Prostaglandin D<sub>2</sub> amplifies lupus disease through basophil accumulation in lymphoid organs

Christophe Pellefigues<sup>1†</sup>, Barbara Dema<sup>1†</sup>, Yasmine Lamri<sup>1</sup>, Fanny Saidoune<sup>1</sup>, Nathalie Chavarot<sup>1</sup>, Charlotte Lohéac<sup>1</sup>, Emeline Pacreau<sup>1</sup>, Michael Dussiot<sup>2</sup>, Caroline Bidault<sup>1</sup>, Florian Marquet<sup>1</sup>, Mathieu Jablonski<sup>3</sup>, Jonathan M. Chemouny<sup>1,3</sup>, Fanny Jouan<sup>1,4</sup>, Antoine Dossier<sup>4</sup>, Marie-Paule Chauveheid<sup>4</sup>, Delphine Gobert<sup>4</sup>, Thomas Papo<sup>1,4</sup>, Hajime Karasuyama<sup>5</sup>, Karim Sacré<sup>1,4</sup>, Eric Daugas<sup>1,3</sup> and Nicolas Charles<sup>1\*</sup>.

<sup>1</sup>Centre de Recherche sur l'Inflammation, INSERM UMR1149, CNRS ERL8252, Université Paris Diderot, Sorbonne Paris Cité, Faculté de Médecine site Bichat, Laboratoire d'Excellence Inflammex, DHU FIRE, 16 rue Henri Huchard, 75018 Paris, France. <sup>2</sup>INSERM UMR 1163, Laboratory of Cellular and Molecular Mechanisms of Hematological Disorders and Therapeutic Implications, Institut Imagine, 24 boulevard du Montparnasse, 75015 Paris, France. <sup>3</sup>Department of Nephrology, Hôpital Bichat, Assistance Publique-Hôpitaux de Paris, Université Paris Diderot, Faculté de Médecine site Bichat, DHU FIRE, 46 rue Henri Huchard, 75018 Paris, France. <sup>4</sup>Department of Internal Medicine, Hôpital Bichat, Assistance Publique-Hôpitaux de Paris, Université Paris Diderot, Faculté de Médecine site Bichat, DHU FIRE, 46 rue Henri Huchard, 75018 Paris, France. <sup>5</sup> Department of Immune Regulation, Graduate School of Medical and Dental Sciences, Tokyo Medical and Dental University (TMDU), Tokyo 113-8510, Japan. †: contributed equally.

**\*Corresponding Author:** Nicolas Charles, Centre de Recherche sur l'Inflammation, INSERM UMR1149, CNRS ERL8252, Sorbonne Paris Cité, Université Paris Diderot, Faculté de Médecine site Bichat, 16 rue Henri Huchard, 75018 Paris, France. Phone: +33 157277306  
E-mail: nicolas.charles@inserm.fr

Supplementary Table 1. SLE Patient and healthy control characteristics

| Variables                                   | SLE patients |                     |                   | Healthy controls |                   |
|---------------------------------------------|--------------|---------------------|-------------------|------------------|-------------------|
|                                             | ALL SLE      | Inactive (SLEDAI≤1) | Mild (1<SLEDAI≤4) |                  | Active (SLEDAI>4) |
| <b>Demographic characteristics</b>          |              |                     |                   |                  |                   |
| n                                           | 222          | 61                  | 50                | 111              | 140               |
| Age, mean±SD, yr                            | 37.7±12.1    | 42.9±14.2           | 37.1±10.4         | 35.2±10.7        | 35.9±12.9         |
| Female, n (%)                               | 195 (87)     | 52 (85)             | 42 (84)           | 101 (91)         | 73 (52)           |
| <b>Lupus characteristics</b>                |              |                     |                   |                  |                   |
| Disease duration, mean±SD, yr               | 10.1±8.2     | 11.5±8.9            | 11.3±7.5          | 8.85±8.0         | -                 |
| Anti-dsDNA Ab positive, n (%)               | 126 (57)     | 10 (16)             | 32 (64)           | 84 (76)          | -                 |
| History of lupus nephritis, n (%)           | 175 (78)     | 36 (59)             | 35 (70)           | 104 (93)         | -                 |
| SLEDAI                                      |              |                     |                   |                  |                   |
| Mean±SD                                     | 6.9±7.3      | 0.0±0.1             | 2.8±1.0           | 12.6±6.2         | -                 |
| Median (range)                              | 4 (0-43)     | 0 (0-1)             | 2 (2-4)           | 11 (5-43)        | -                 |
| <b>Treatment characteristics</b>            |              |                     |                   |                  |                   |
| Current prednisone dose (mg/day)            |              |                     |                   |                  |                   |
| Mean±SD                                     | 25.8±87.35   | 4.2±3.9             | 7.5±8.9           | 45.5±119.8       | -                 |
| 15mg/day or higher, n (%)                   | 42 (19)      | 0 (0)               | 5 (10)            | 37 (33)          | -                 |
| Concurrent immunosuppressive therapy (n, %) |              |                     |                   |                  |                   |
| hydroxychloroquine                          | 187 (84)     | 54 (88)             | 47 (94)           | 86 (77)          | -                 |
| mycophenolate mofetil                       | 63 (28)      | 16 (26)             | 20 (40)           | 27 (24)          | -                 |
| IV cyclophosphamide                         | 3 (1)        | 0 (0)               | 0 (0)             | 3 (2)            | -                 |
| azathioprine                                | 28 (12)      | 8 (13)              | 7 (14)            | 13 (11)          | -                 |

SD: standard deviation; yr : year ; IV: intravenous.

**SUPPLEMENTARY FIGURE 1**

**a**

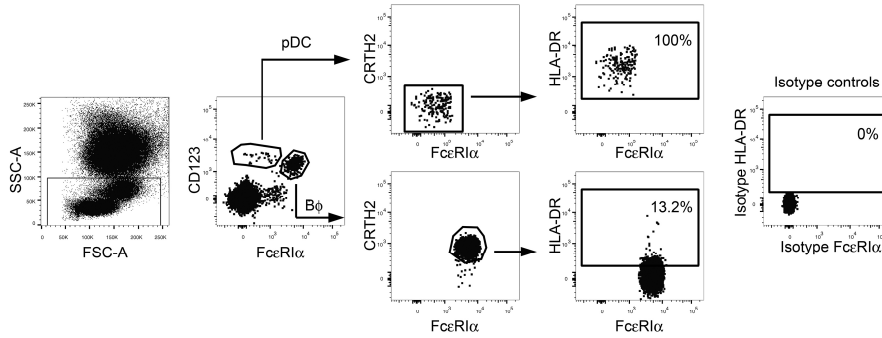

**b**

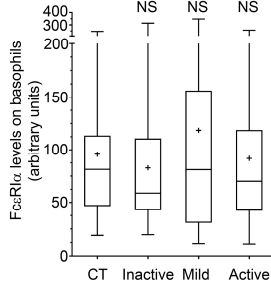

**c**

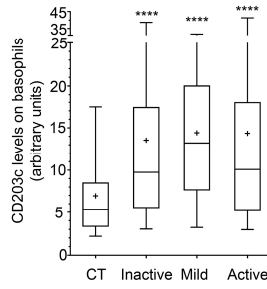

**d**

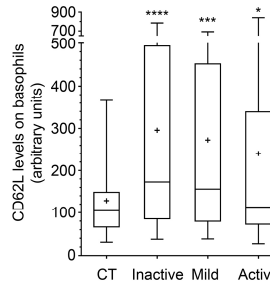

**e**

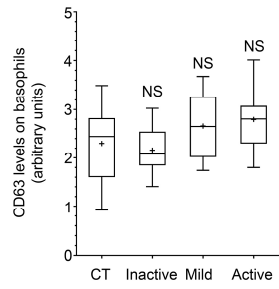

**f**

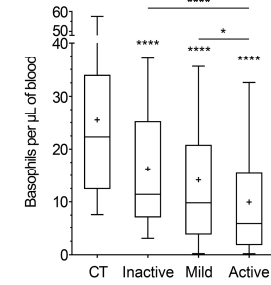

**g**

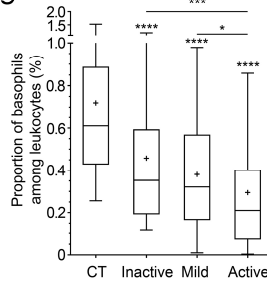

**h**

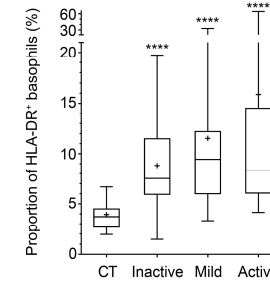

**i**

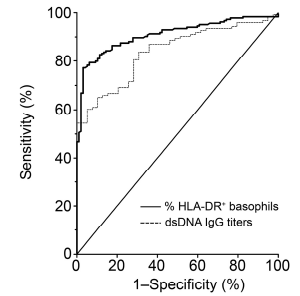

**j**

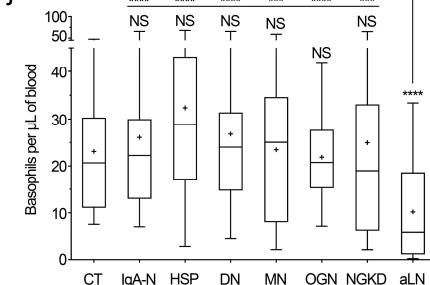

**k**

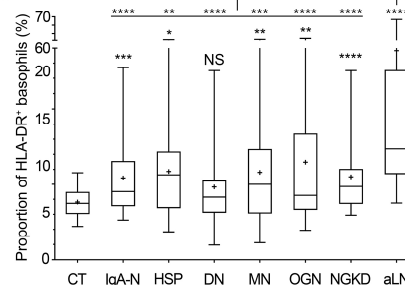

**l**

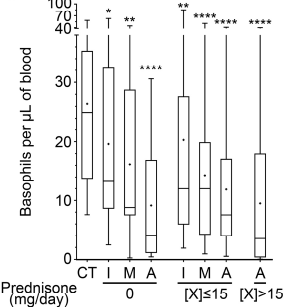

**m**

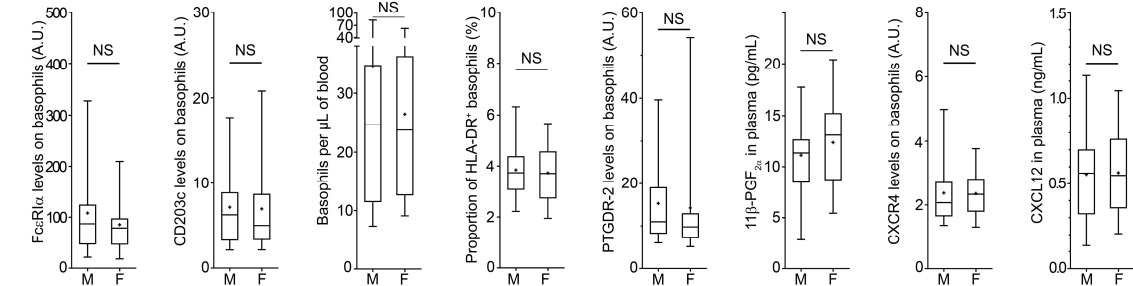

**Supplementary Fig. 1: Basopenia and basophil activation status are associated with active lupus disease.**

**Supplementary Fig. 1 legend: Basopenia and basophil activation status are specific of active lupus disease.**

(a) FACS gating strategy of blood basophils (B $\phi$ ) defined as SSC<sup>lo</sup>CD123<sup>+</sup>Fc $\epsilon$ R1 $\alpha$ <sup>+</sup>PTGDR-2<sup>+</sup> from an active SLE patient compared to plasmacytoid dendritic cells (pDC) defined as SSC<sup>lo</sup> CD123<sup>+</sup> Fc $\epsilon$ R1 $\alpha$ <sup>lo</sup> PTGDR-2<sup>-</sup> and HLA-DR expression by the two distinct cell types. This gating strategy for human basophils was used in **Fig. 1-3** and in **Supplementary Fig. 1-3**. (b) Fc $\epsilon$ R1 $\alpha$  levels on blood basophils from healthy controls (CT) and subjects with inactive, mild or active SLE ( $n = 130/55/43/101$ , respectively) as in (a). (c-e) CD203c ( $n = 129/60/41/99$ ) (c), CD62L ( $n = 112/49/40/85$ ) (d) and CD63 ( $n = 12/14/6/12$ ) (e) levels on blood basophils from subjects as in (b). (f) Basophils per  $\mu$ L of blood from subjects as in (b) ( $n = 116/55/42/103$ ). (g) Proportion of basophils among leukocytes in blood from subjects as in (b) ( $n = 121/60/43/103$ ) (h) Proportion of blood HLA-DR<sup>+</sup> basophils as determined in (a) in subjects as in (b) ( $n = 126/60/43/100$ ). (i) Receiver Operating Characteristic (ROC) curve analysis of the proportion of HLA-DR<sup>+</sup> basophils in SLE patients ( $n = 184$ ) versus CT ( $n = 97$ ) (thick line) and of dsDNA-specific IgG titers (dotted line) in SLE patients ( $n = 123$ ) versus CT ( $n = 39$ ). ROC Area Under Curve comparison as described in the **methods**: 0.9091 vs 0.8384, respectively,  $P = 0.03$ . (j) Basophils per  $\mu$ L of blood as in (f) from CT and patients with the following active renal diseases: IgA-N: IgA nephropathy; HSP: Henoch-Schönlein purpura nephropathy; DN: Diabetic Nephropathy; MN: membranous nephropathy; OGN: Other glomerular nephropathies; NGKD: Non-Glomerular Kidney Diseases; aLN: active Lupus Nephritis ( $n = 87/40/20/39/22/42/46/81$ , respectively). (k) Proportion of blood HLA-DR<sup>+</sup> basophils in patients with active renal diseases as in (j) ( $n = 96/40/20/39/21/51/47/77$ , respectively). (l) Basophils per  $\mu$ L of blood as in (f) from CT ( $n = 89$ ) and subjects with inactive (I), mild (M) or active (A) SLE and their corresponding dose of prednisone ([X], mg/day) (0:  $n = 23/13/17$ ;  $1 \leq [X] \leq 15$ :  $n = 32/27/40$ ;  $[X] > 15$ :  $n = 28$ , respectively). (m) Healthy control males (M) and females (F) comparison for (from left to right): Fc $\epsilon$ R1 $\alpha$  ( $n = 55/65$ ) and CD203c ( $n = 55/65$ ) levels on blood basophils, number of basophils per  $\mu$ L of blood ( $n = 48/61$ ), proportion of blood HLA-DR<sup>+</sup> basophils ( $n = 48/42$ ), PTGDR-2 levels on blood basophils ( $n = 38/50$ ), 11 $\beta$ -PGF<sub>2</sub> $\alpha$  levels in plasma ( $n = 18/22$ ), CXCR4 levels on blood basophils ( $n = 36/49$ ) and CXCL12 levels in plasma ( $n = 38/40$ ). (b-h, j-m) Data are presented as median and interquartile ranges with whiskers representing 5-95 percentiles and the mean presented as a '+' symbol. Statistical analyses were by Mann-Whitney tests. NS: not significant, \*:  $P < 0.05$ , \*\*:  $P < 0.01$ , \*\*\*:  $P < 0.001$ , \*\*\*\*:  $P < 0.0001$ . Comparison to control group is shown above each bar and to the corresponding bars when indicated. A.U.: arbitrary units.

## SUPPLEMENTARY FIGURE 2

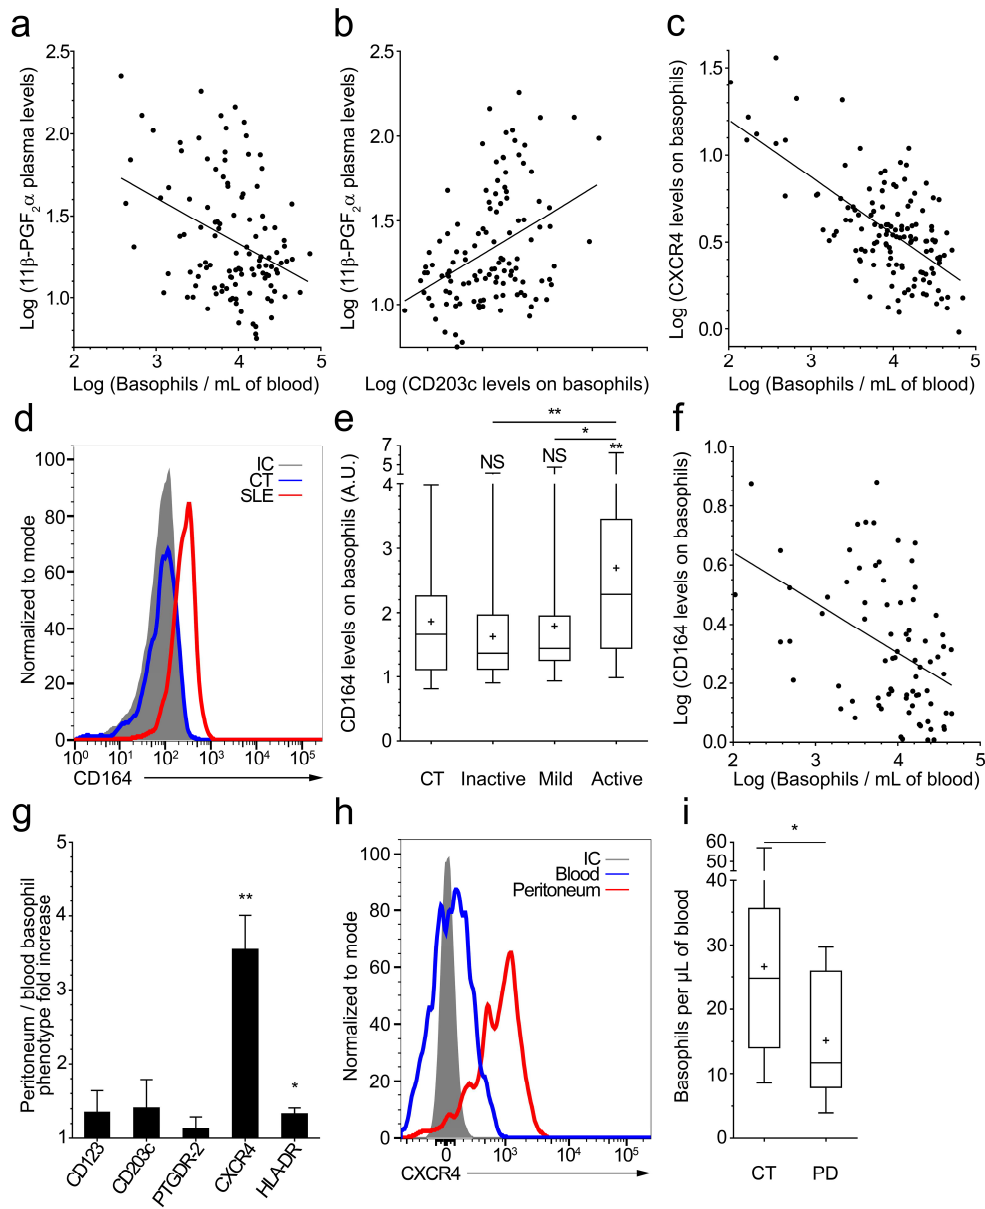

**Supplementary Fig. 2: PGD<sub>2</sub> and CXCL12 axes correlate with basopenia during lupus and non-sterile peritonitis.**

(a-c) Spearman correlation (and linear regression) between blood basophil number and 11 $\beta$ -PGF<sub>2</sub> $\alpha$  plasma levels in SLE patients ( $r = -0.2731$ ,  $P = 0.0031$ ,  $n = 115$ ) (a), between basophil CD203c expression and 11 $\beta$ -PGF<sub>2</sub> $\alpha$  plasma levels in SLE patients ( $r = 0.3695$ ,  $P < 0.0001$ ,  $n = 129$ ) (b), and between blood basophil number and CXCR4 levels on basophils as defined in Fig. 2a,b ( $r = -0.5114$ ,  $P < 0.0001$ ,  $n = 133$ ) (c). (d) Representative FACS analysis of CD164 levels on blood basophils from one healthy control (CT) and a subject with active SLE compared to isotype control staining (IC). (e) CD164 levels on blood basophils from subjects as in Fig. 1a ( $n = 62/16/11/46$ , respectively). (f) Spearman correlation (and linear regression) between basophil number and CD164 levels on basophils (as defined in e) ( $r = -0.4606$ ,  $P < 0.0001$ ,  $n = 78$ ). (g) Variation of the indicated marker expression between blood and peritoneal basophils from patients being treated for non-sterile peritonitis (PD) ( $n = 6$ ) assessed by flow cytometry. Data are presented as mean  $\pm$  s.e.m. Statistical analysis was by one sample t test compared to a 1 theoretical value. (h) Representative FACS analysis of CXCR4 levels on blood and peritoneal basophils compared to IC staining from one patient as in (g). (i) Basophils per  $\mu$ L of blood in CT ( $n = 103$ ) and PD ( $n = 6$ ). (e,i) Data are presented as median and interquartile ranges with whiskers representing 5-95 percentiles and the mean presented as a '+' symbol. Statistical analyses were by Mann-Whitney tests. (e,g,i) NS: not significant, \*:  $P < 0.05$ , \*\*:  $P < 0.01$ . Comparison to control group is shown above each bar and to the corresponding bars when indicated. A.U.: arbitrary units.

SUPPLEMENTARY FIGURE 3

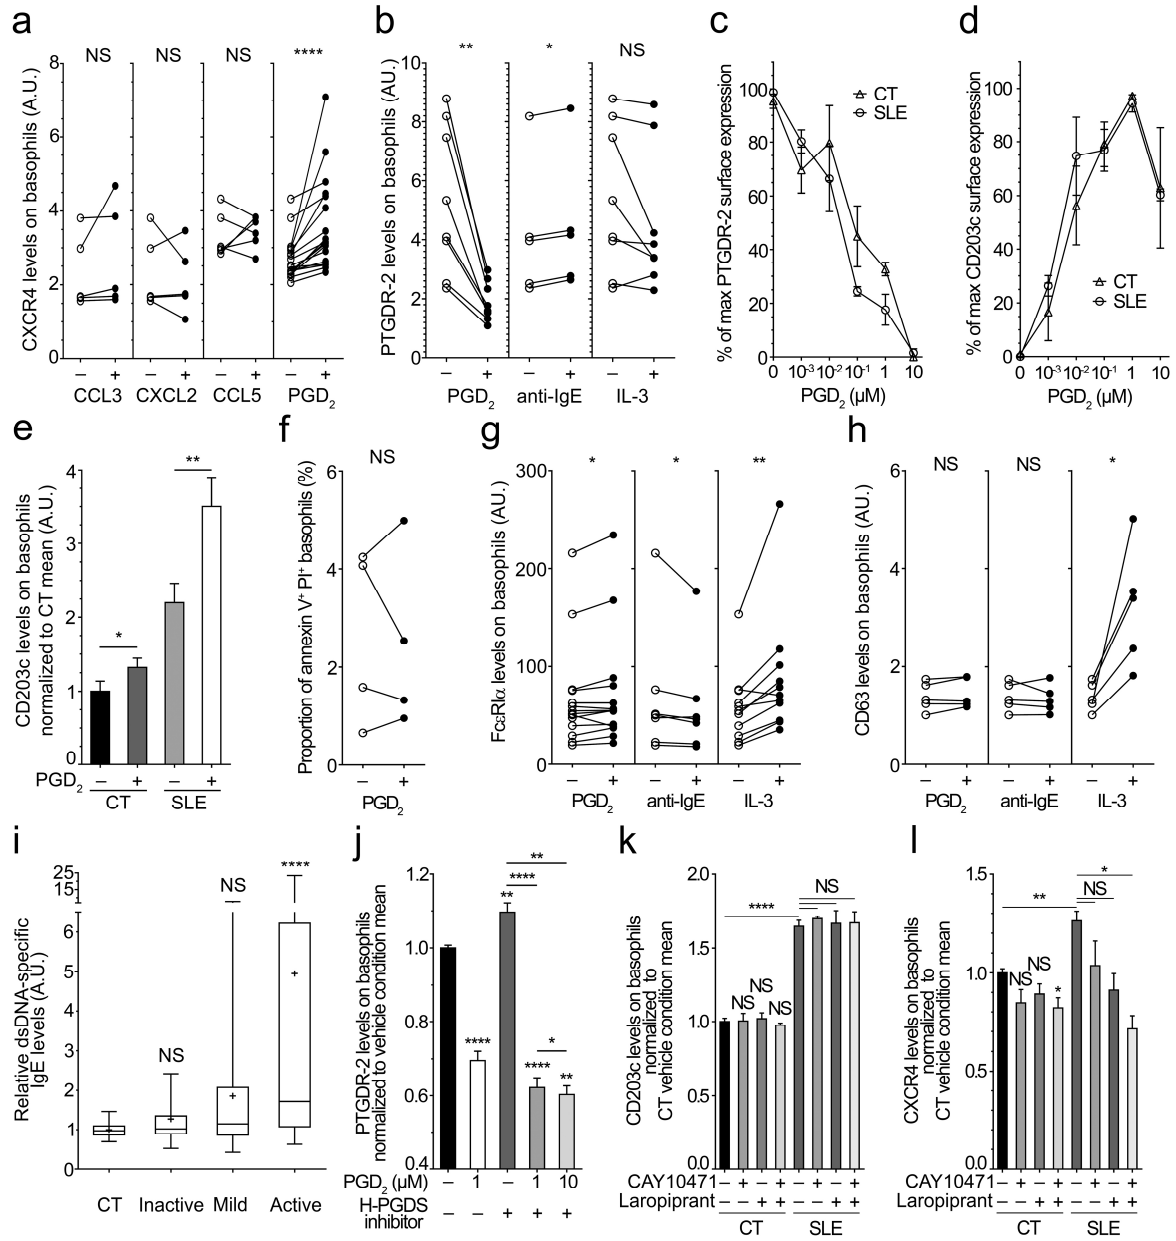

Supplementary Fig. 3: Effects of PGD<sub>2</sub>, other SLE-related molecules and H-PGDS inhibitor on human basophil phenotype *ex vivo*.

**Supplementary Fig. 3 legend: Effects of PGD<sub>2</sub>, other SLE-related molecules and H-PGDS inhibitor on human basophil phenotype *ex vivo*.**

(a) Purified human basophils were incubated 4 hours without (-) or with the indicated compounds (CCL3, CXCL2 and CCL5 at 50 nM and PGD<sub>2</sub> at 1 μM) and CXCR4 expression levels were determined by flow cytometry (FACS). (b) PTGDR-2 expression levels on blood basophils after 18 hours of incubation without (-) or with (+) PGD<sub>2</sub>, anti-human IgE antibodies or IL-3 were assessed by FACS as in **Fig. 3**. (c,d) Effect of PGD<sub>2</sub> (in μM) on PTGDR-2 internalization (PTGDR-2 surface expression levels) (c) and CD203c externalization (d) on human blood basophils after 18 hours of incubation as measured by FACS. (e) Purified human basophils from CT (*n* = 5) and from active SLE subjects (*n* = 5) were incubated 18 hours without (-) or with (+) 1 μM PGD<sub>2</sub> and CD203c expression levels were determined by FACS. (f) Purified Human basophils were incubated 24 hours in the presence (+) or not (-) of 1 μM PGD<sub>2</sub>. Basophils were then stained with annexin V and propidium iodide (PI). Proportion of double positive basophils (%) are shown. Statistical analysis was by paired Student t test. (g,h) FcεRIα (g) and CD63 (h) levels on basophils as in (b). (i) dsDNA-specific IgE levels in plasma from inactive, mild or active SLE individuals (*n* = 41/29/51, respectively) normalized to the control values mean (*n* = 38) as measured by ELISA. (j) PTGDR-2 levels were assessed by FACS on purified blood basophils after 4 hours of incubation with or without 1 μM of H-PGDS inhibitor I ± 1 or 10 μM of PGD<sub>2</sub>. Values are normalized to the mean value of the vehicle conditions. For each condition, 3 to 12 independent experiments were conducted. (k,l) Leukocytes from CT (*n* = 4) and from active SLE subjects (*n* = 4) were incubated for 4 hours in the presence of 1 μM of the indicated compounds, and CD203c (k) and CXCR4 (l) expression levels on basophils were assessed by FACS. Geometric MFI / Geometric MFI of isotype controls ratios were normalized on CT vehicle condition mean. (c-e,j-l) Data are presented as mean ± s.e.m. (i) Data are presented as median and interquartile ranges with whiskers representing 5-95 percentiles and the mean presented as a '+' symbol. (a-j) Statistical analyses were by Wilcoxon matched-pairs signed rank test (a-d, f-h), Mann-Whitney test (i), paired Student t test (e,j). (k,l) Statistical analysis were by paired Student t test for comparison inside each group (CT or SLE) and by unpaired Student t test for comparison between groups (CT vs SLE). (a-l) NS: not significant, \*: P<0.05, \*\*: P<0.01, \*\*\*\*: P<0.0001. Comparison to control group is shown above each bar and to the corresponding bars when indicated. A.U.: arbitrary units.

**SUPPLEMENTARY FIGURE 4**

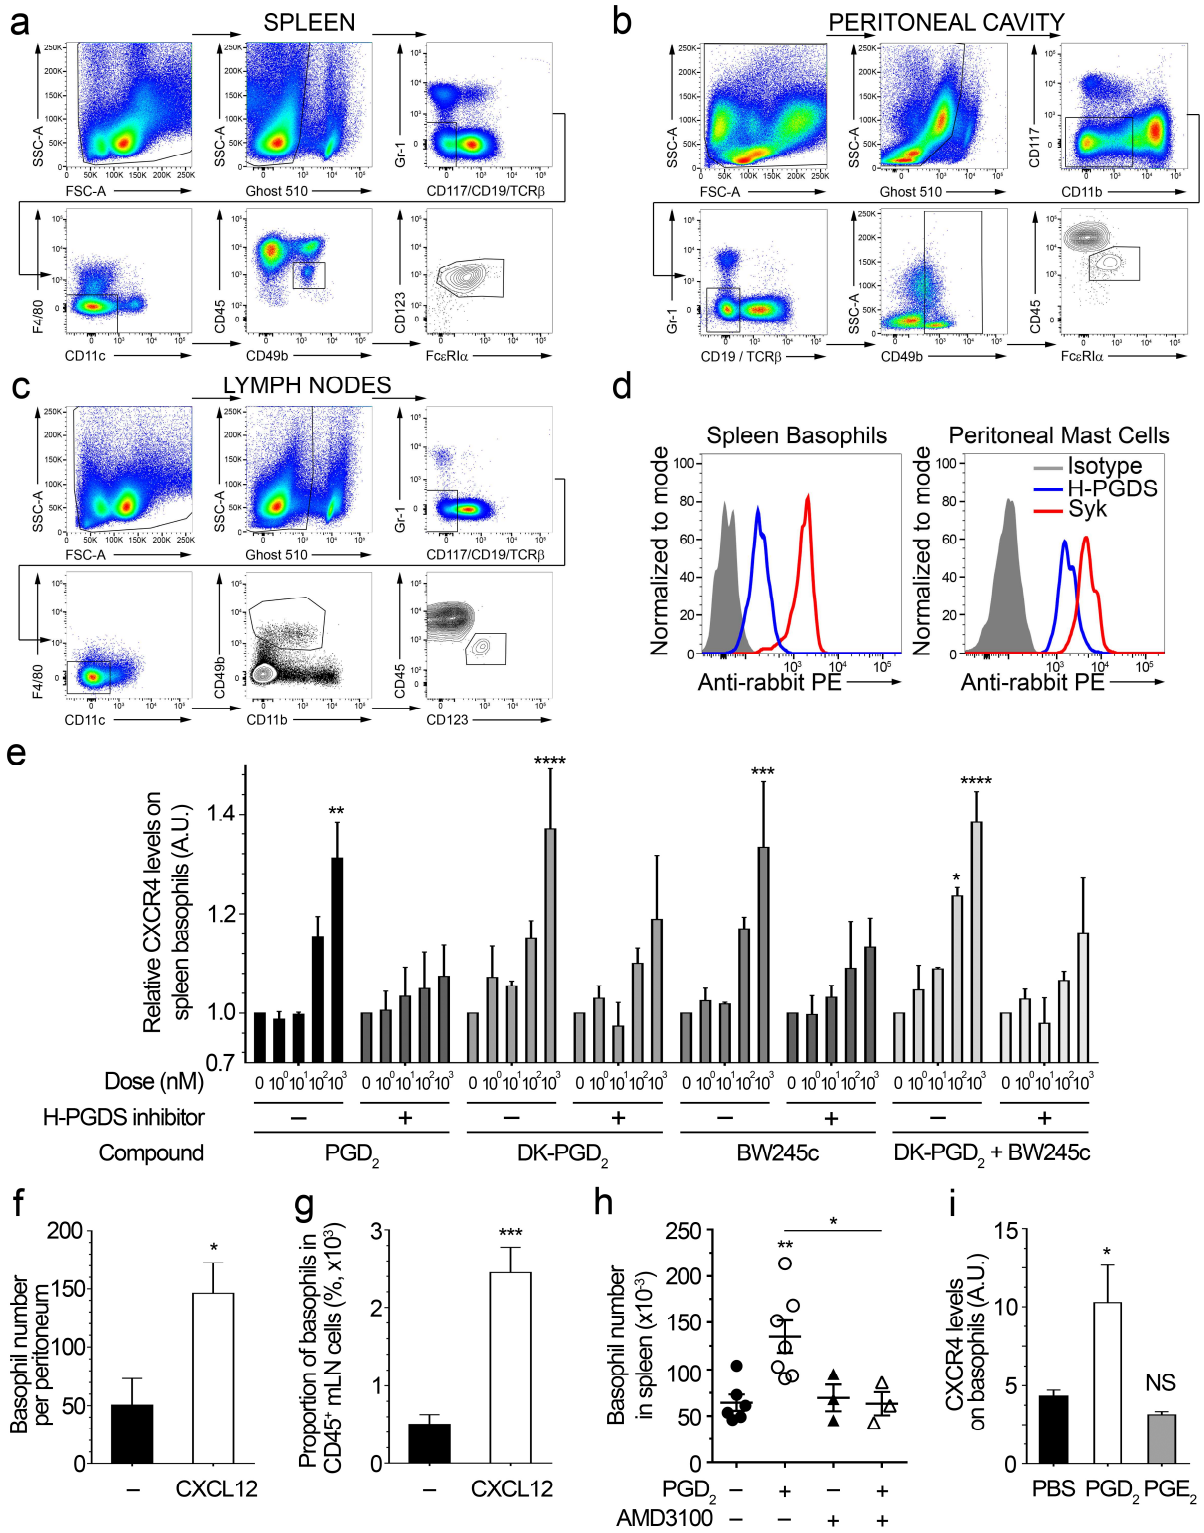

**Supplementary Fig. 4: PGD<sub>2</sub>-PTGDR and CXCL12-CXCR4 axes on CXCR4 expression by mouse basophils and their migration *ex vivo* and *in vivo*.**



**Supplementary Fig. 4 legend: PGD<sub>2</sub>-PTGDR and CXCL12-CXCR4 axes on CXCR4 expression by mouse basophils and their migration *ex vivo* and *in vivo*.**

(a-c) FACS gating strategies for mouse basophils from spleen (a), lymph node (b) and peritoneal lavage (c), gated on singlets. These strategies have been used for all the presented data in Fig. 3-6 and Supplementary Fig. 4-8. Data from a 30 weeks old *Lyn*<sup>-/-</sup> mouse are presented here. (d) FACS histograms showing H-PGDS expression by WT mouse basophils, as assessed by intracellular staining with rabbit IgG (isotype, grey filled), rabbit anti-H-PGDS (blue line) and rabbit anti-Syk (red line) in mouse spleen basophils (left panel) and peritoneal mast cells (FcεRIα<sup>+</sup> CD117<sup>+</sup>) (right panel). (e) Relative CXCR4 expression levels on spleen basophils from young WT mice incubated 4 hours without (0) or with the indicated concentration (nM) of the indicated compound(s) as determined by flow cytometry. DK- PGD<sub>2</sub>: 13,14-dihydro-15-keto-PGD<sub>2</sub> (PTGDR-2 specific agonist); BW245c: 3-(3-Cyclohexyl-3-hydroxypropyl)-2,5-dioxo-(R\*,S\*)-(±)-4-imidazolineheptanoic acid (PTGDR-1 specific agonist). Data are normalized to control value mean (per group, n = 4 to 8). (f) Number of basophils in peritoneal lavage from young WT mice 24 hours after intraperitoneal (ip) injection of CXCL12 compared to steady state (-) values (n = 13/5, respectively). (g) Proportions of basophils in mesenteric lymph node (mLN) from the same mice as in (f). (h) Basophil number in spleen from young *Lyn*<sup>-/-</sup> mice 24 hours after ip injection of the indicated compound(s) (same mice as in Fig. 4h-j). (i) CXCR4 expression levels on spleen basophils from young *Lyn*<sup>-/-</sup> mice injected over ten days with PBS (n = 8), PGD<sub>2</sub> (n = 9) or PGE<sub>2</sub> (n = 3) as described in Supplementary Fig. 6 and as determined by flow cytometry. (e-i) Data are presented as mean ± s.e.m. (e) Statistical analysis was by two-ways ANOVA followed by a Tukey's multiple comparisons test. (f-i) Statistical analyses were by unpaired Student t tests with Welch's correction. (e-i) . NS: not significant, \*: P<0.05, \*\*: P<0.01, \*\*\*: P<0.001, \*\*\*\*: P<0.0001. Comparison to control group is shown above each bar and to the corresponding bars when indicated. A.U.: arbitrary units.

**SUPPLEMENTARY FIGURE 5**

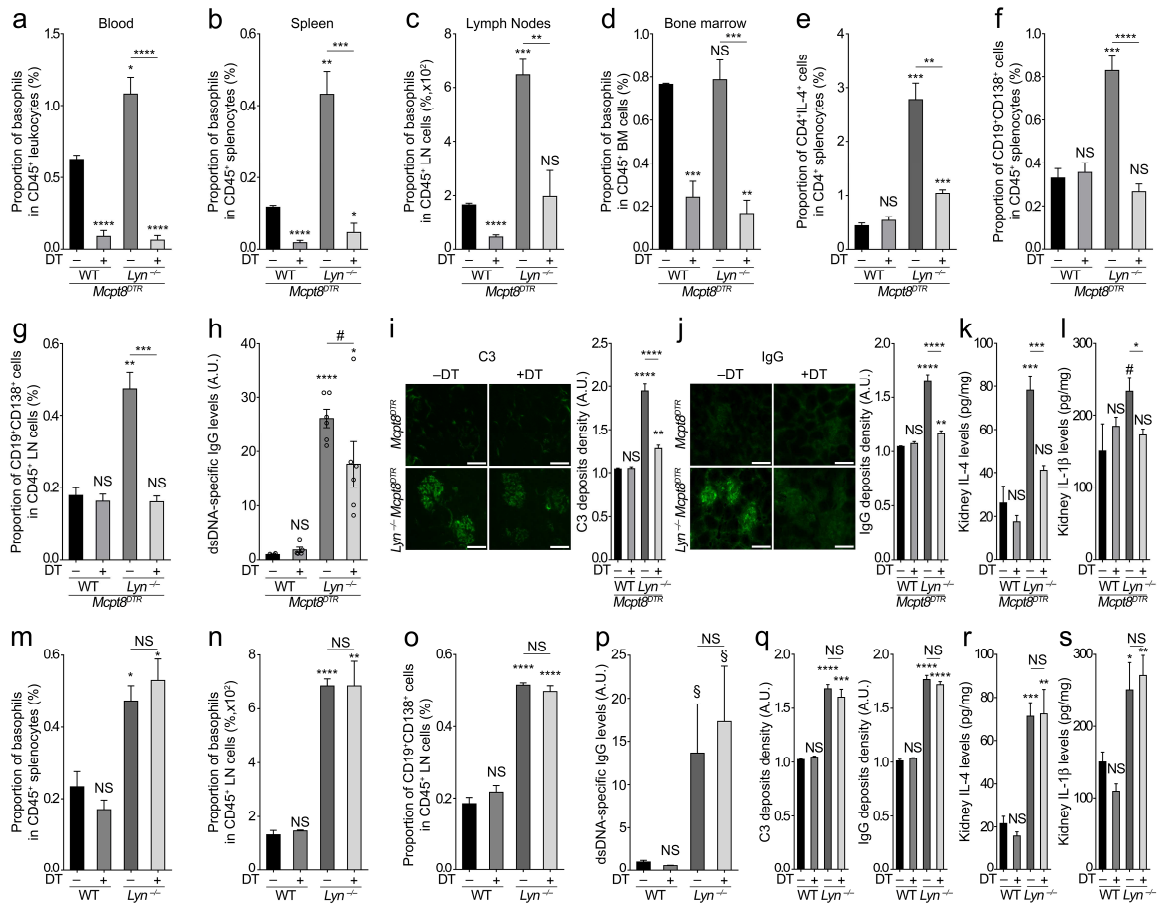

**Supplementary Fig. 5: Validation in *Mcpt8<sup>DTR</sup>* background of basophil contribution to *Lyn<sup>-/-</sup>* mice lupus-like disease**

(a-d) Proportion of basophils among singlets living CD45<sup>+</sup> cells in blood (a), spleen (b), lymph nodes (cervical, brachial and inguinal) (c) and bone marrow (d) from aged *Mcpt8<sup>DTR</sup>* basophil-depleted (DT+, n = 5) or not (DT-, n = 4) and from aged *Lyn<sup>-/-</sup> Mcpt8<sup>DTR</sup>* basophil-depleted (DT+, n = 6) or not (DT-, n = 6) through diphtheria toxin (DT) injections following the protocol indicated in the **methods**. (e) Proportion of IL-4 producing CD4<sup>+</sup> T cells among CD4<sup>+</sup> T cells in splenocytes from aged *Mcpt8<sup>DTR</sup>* and *Lyn<sup>-/-</sup> Mcpt8<sup>DTR</sup>* mice, basophil-depleted (DT+) or not (DT-) after 4 hours *ex vivo* incubation in the presence of brefeldin A. Per group, n = 4. (f,g) Proportion of short lived plasma cells CD19<sup>+</sup>CD138<sup>+</sup> among singlets living CD45<sup>+</sup> cells in spleen (f) and lymph nodes (g) in mice as in (a). (h) dsDNA-specific IgG relative titers in serum from mice as in (a) normalized to the mean of WT DT- values, as determined by ELISA. (i,j) Immunofluorescent staining for C3 (i) and IgG (j) of deposits in glomeruli from aged *Mcpt8<sup>DTR</sup>* basophil-depleted (DT+, n = 3) or not (DT-, n = 3) and from aged *Lyn<sup>-/-</sup> Mcpt8<sup>DTR</sup>* basophil-depleted (DT+, n = 4) or not (DT-, n = 4), and their respective quantifications. (k,l) IL-4 (k) and IL-1β (l) concentrations in total kidney protein extracts from the same mice as in (a) as measured by ELISA. (m-n) Proportion of basophils among singlets living CD45<sup>+</sup> cells in spleen (m) and lymph nodes (cervical, brachial and inguinal) (n) from aged WT C57BL/6 mice injected with DT (DT+, n = 3) or not (DT-, n = 4) and from aged *Lyn<sup>-/-</sup>* injected with DT (DT+, n = 4) or not (DT-, n = 4) following the protocol indicated in the **methods**. (o) Proportion of short lived plasma cells CD19<sup>+</sup>CD138<sup>+</sup> among singlets living CD45<sup>+</sup> cells in lymph nodes in mice as in (m). (p) dsDNA-specific IgG relative titers in serum from mice as in (m) normalized to the mean of WT DT- values, as determined by ELISA. (q) Quantification of immunofluorescent staining for C3 (left) and IgG (right) of deposits in glomeruli from mice described in (m) as in (i,j). (r,s) IL-4 (r) and IL-1β (s) concentrations in total kidney protein extracts from the same mice as in (m) as measured by ELISA. (a-g, m-o) Indicated parameters were assessed by flow cytometry. (a-s) Data are presented as mean ± s.e.m. Each set of data represent two pooled independent experiments. Statistical analyses were by unpaired Student t tests. NS: not significant, §: p < 0.1, #: p = 0.06, \*: P < 0.05, \*\*: P < 0.01, \*\*\*: P < 0.001, \*\*\*\*: P < 0.0001. Comparison to control group is shown above each bar and to the corresponding bars when indicated. A.U.: arbitrary units.

**SUPPLEMENTARY FIGURE 6**

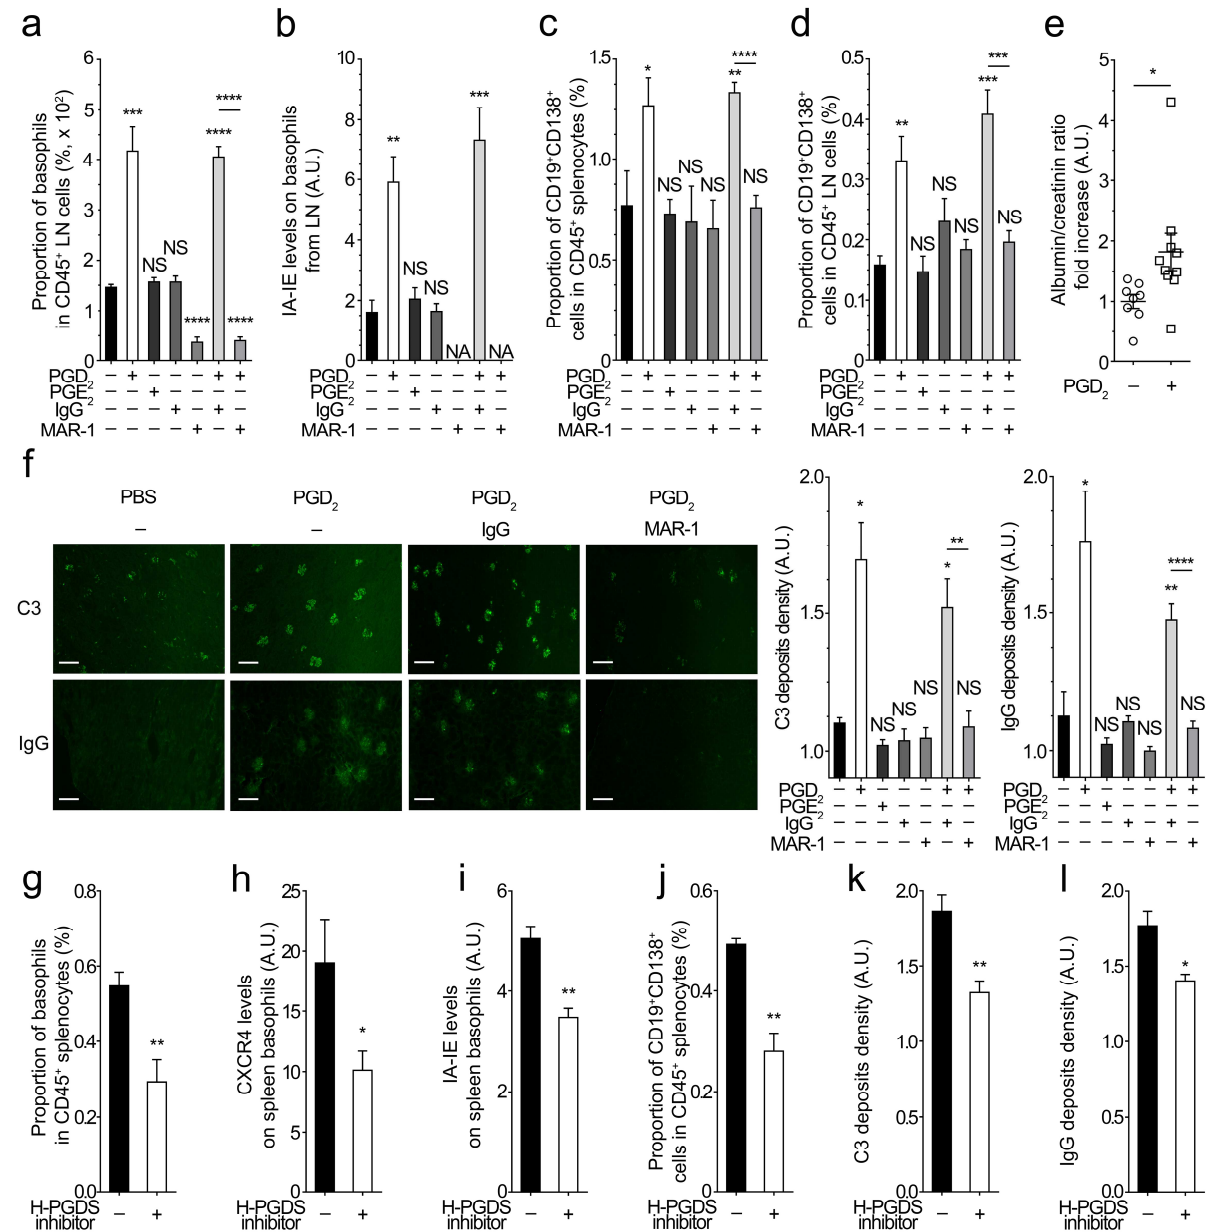

**Supplementary Fig. 6. PGD<sub>2</sub> controls a basophil-dependent disease acceleration in *Lyn*<sup>-/-</sup> mice.**

(a) Proportion of basophils among living CD45<sup>+</sup> cells in lymph nodes (cervical, brachial and inguinal) from young *Lyn*<sup>-/-</sup> mice injected over ten days with PBS (*n* = 5), PGD<sub>2</sub> (*n* = 6), PGE<sub>2</sub> (*n* = 3), PBS + isotype (IgG) (*n* = 3), PBS + MAR-1 (basophil-depleted) (*n* = 3), PGD<sub>2</sub> + isotype (*n* = 8), and PGD<sub>2</sub> + MAR-1 (*n* = 9) as in **Supplementary Fig. 4c**. (b) IA-IE expression on basophils as in (a). NA: not applicable. (c,d) Proportion of CD19<sup>+</sup>CD138<sup>+</sup> cells among CD45<sup>+</sup> cells in spleen (c) and lymph nodes (d) in mice as in (a). (e) Urine albumin/creatinine ratio (after/before) after PBS (*n* = 8) or PGD<sub>2</sub> (*n* = 10) 10 days-long treatment (f) Representative immunofluorescence staining for C3 and IgG deposits in kidneys from mice as in (a) (scale bar = 1 mm) and their quantifications. (g-l) Aged (sick) *Lyn*<sup>-/-</sup> mice were treated by daily oral gavage over ten days with H-PGDS inhibitor (5 mg/kg per dose) (+, *n* = 7) or vehicle (-, *n* = 9). (g) Proportion of basophils among living CD45<sup>+</sup> splenocytes. (h,i) CXCR4 (h) and IA-IE (i) expressions on basophils as in (g). (j) Proportion of CD19<sup>+</sup>CD138<sup>+</sup> cells among CD45<sup>+</sup> splenocytes. (k,l) Quantification of C3 (k) and IgG (l) deposits in glomeruli of kidneys from mice as in (g). (a-d, g-j) Parameters were assessed by flow cytometry. Data represent three pooled (a-f) and two pooled (g-l) independent experiments. (a-l) Data are presented as mean ± s.e.m. Statistical analyses were by unpaired Student t tests. NS: not significant, \*: P<0.05, \*\*: P<0.01, \*\*\*: P<0.001, \*\*\*\*: P<0.0001. Comparison to control group is shown above each bar and to the corresponding bars when indicated. A.U.: arbitrary units.

## SUPPLEMENTARY FIGURE 7

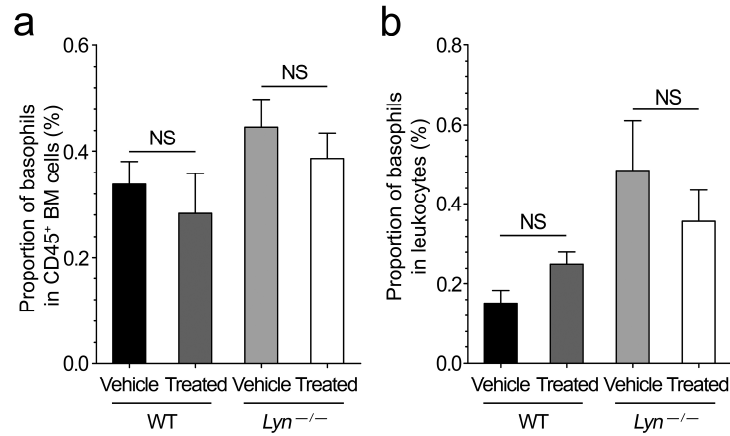**Supplementary FIGURE 7: Effects of PTGDR antagonists on basophil proportions in bone marrow and blood.**

Comparisons between aged wild-type (WT) and *Lyn*<sup>-/-</sup> mice treated or not (vehicle) with PTGDR-1 and PTGDR-2 antagonists for ten days as in **Fig. 6** and **7**. **(a,b)** Flow cytometric analysis of basophil proportion (%) among singlets living CD45<sup>+</sup> bone marrow (BM) cells **(a)** and blood leukocytes **(b)**. WT vehicle,  $n = 5$ ; WT treated,  $n = 4$ ; *Lyn*<sup>-/-</sup> vehicle,  $n = 8$ ; *Lyn*<sup>-/-</sup> treated,  $n = 8$ . Data are expressed as means + s.e.m.. **(a,b)** Statistical analyses were by unpaired Student *t* tests. NS: not significant.

**SUPPLEMENTARY FIGURE 8**

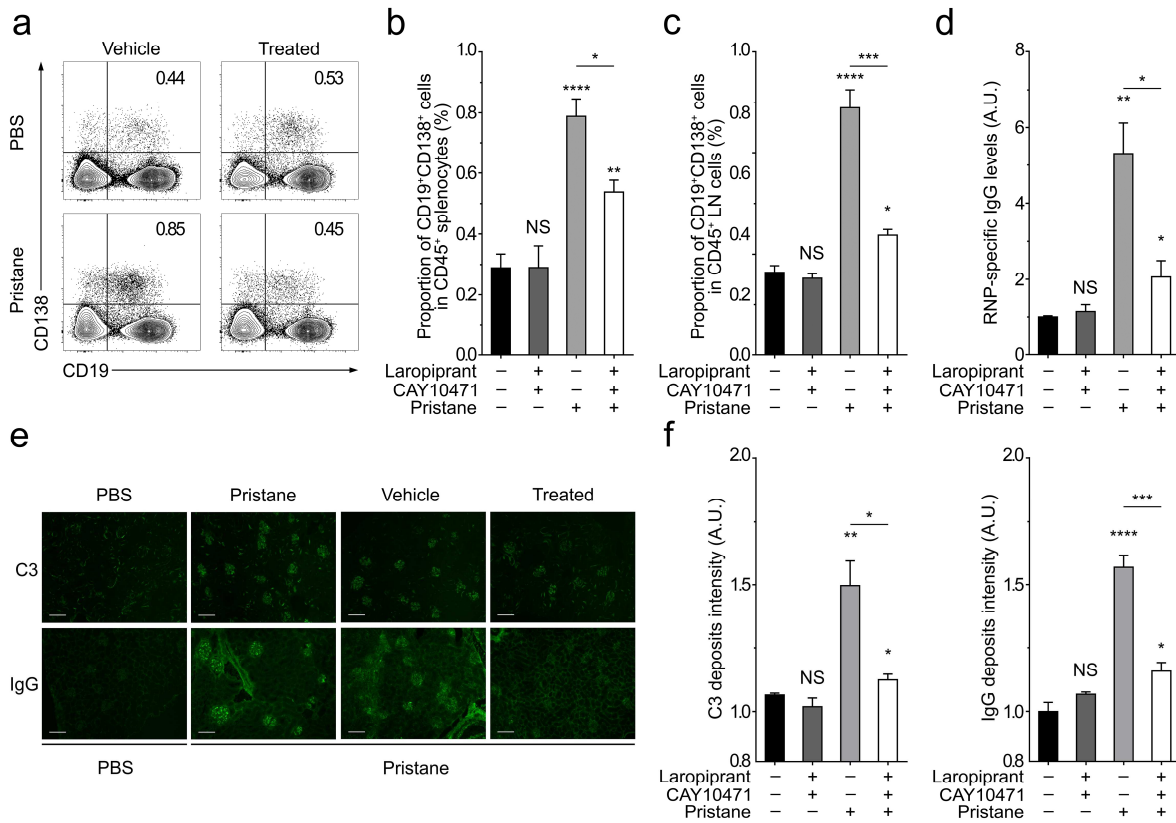

**Supplementary Fig. 8: Blockade of basophil accumulation in SLOs dampens lupus-like disease activity in pristane-induced lupus mouse model.**

(a) Representative dot plots showing proportion of spleen CD19<sup>+</sup>CD138<sup>+</sup> short-lived plasma cells upon treatment as described in (b). (b,c) Proportion of CD19<sup>+</sup>CD138<sup>+</sup> short lived plasma cells among singlets living CD45<sup>+</sup> cells in spleen (b) and in lymph nodes (c) from 32 weeks old WT mice 24 weeks after *ip* injection of PBS or pristane mice treated or not (vehicle) with PTGDR-1 (Laropiprant) and PTGDR-2 (CAY10471) antagonists for ten days, as described in Fig. 6 and as determined by flow cytometry. (d) RNP-specific IgG titers in serum from the indicated mice as measured by ELISA. (e) Representative immunofluorescence staining for C3 and IgG deposits in kidneys from mice as in (b) (scale bar = 1 mm) and their corresponding quantifications (f). (a-f) Groups of mice are as follows: [PBS + vehicle (*n* = 8)], [PBS + treatment (*n* = 7)], [Pristane + vehicle (*n* = 4)] and [Pristane + treatment (*n* = 4)]. (b-d, f) Data are expressed as means + s.e.m. Statistical analyses were by unpaired Student *t* tests. NS: not significant, \*: *P*<0.05, \*\*: *P*<0.01, \*\*\*: *P*<0.001, \*\*\*\*: *P*<0.0001. Comparison to control group is shown above each bar and to the corresponding bars when indicated. A.U.: arbitrary units.

**SUPPLEMENTARY FIGURE 9**

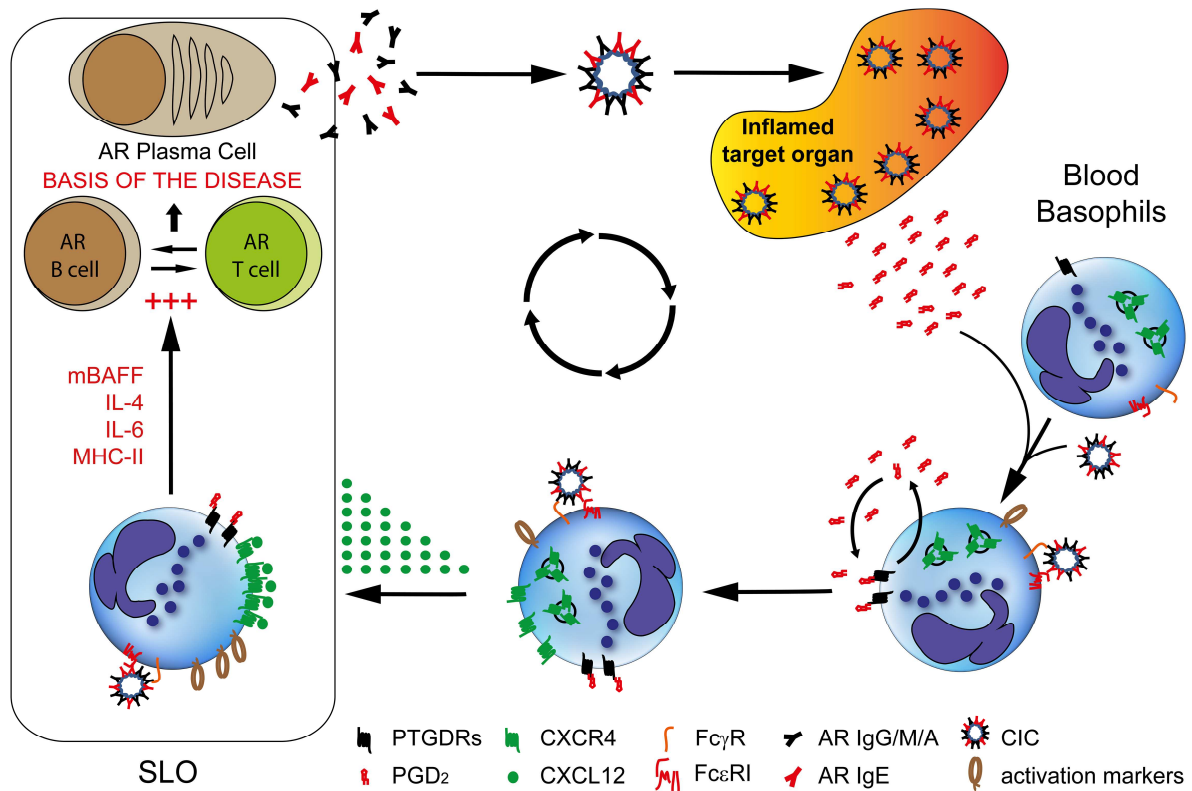

**Supplementary Fig. 9: PGD<sub>2</sub> drives lupus disease amplification by basophils**

In systemic lupus erythematosus (SLE), a loss of self-tolerance induces the expansion of autoreactive (AR) T and B cells. Autoreactive plasma cells secrete autoreactive antibodies which will bind self-antigens of nuclear origin and complement factors to form circulating immune complexes (CIC). The deposition of these CIC or autoreactive antibodies in target organs is associated with local lesions, inflammation (and prostaglandin D<sub>2</sub> (PGD<sub>2</sub>) production), and organ damages. Healthy basophils can get activated by the binding of CIC to Fc receptors (FcεRI and FcγRs) to express more PGD<sub>2</sub> receptors (PTGDRs) and activation markers such as CD203c. As chronic inflammation settles, so does the secretion of various inflammatory mediators in blood, including PGD<sub>2</sub>. PGD<sub>2</sub> is sufficient to induce PGD<sub>2</sub> production by circulating basophils themselves leading to an autocrine effect of PGD<sub>2</sub>. This leads to an increased surface expression of CXCR4 and enable basophil sensitivity to CXCL12 gradients. As a result, basophils are more eager to migrate to secondary lymphoid organs (SLOs), which secrete more CXCL12 during the lupus pathogenesis. There, basophils support autoreactive T and B cells through their expression of activating molecules such as mBAFF, MHC-II or the secretion of various cytokines such as IL-4 and IL-6. Moreover, basophils can promote autoreactive antibody production and IgE class switching of B cells. As CIC and autoreactive IgE titers increase, so will targeted organ inflammation, PGD<sub>2</sub> and CXCL12 titers and basophils homing to SLOs. PGD<sub>2</sub> and basophils may drive an amplification loop of the disease and blocking PGD<sub>2</sub>-mediated basophil recruitment to SLOs may prevent rise in autoantibody titers and consequent flares.

SUPPLEMENTARY TABLE 2:

a

| 24 hours ex vivo effects of PTGDR agonists on CXCR4 expression by splenocytes |                                                                                                                                                        | CXCR4 level variation as compared to CT condition (%; mean ± s.e.m, statistics) |                     |               |
|-------------------------------------------------------------------------------|--------------------------------------------------------------------------------------------------------------------------------------------------------|---------------------------------------------------------------------------------|---------------------|---------------|
| Cell type                                                                     | Gating                                                                                                                                                 | PGD <sub>2</sub>                                                                | DK-PGD <sub>2</sub> | BW245c        |
| Basophils                                                                     | Ghost <sup>-</sup> CD19 <sup>-</sup> TCRβ <sup>-</sup> CD117 <sup>-</sup> CD49b <sup>+</sup> FcεRIα <sup>+</sup> CD123 <sup>+</sup> CD45 <sup>lo</sup> | 26 ± 4.4, **                                                                    | 27 ± 5.0, **        | 32 ± 8.3, *   |
| B cells                                                                       | Ghost <sup>-</sup> CD45 <sup>+</sup> TCRβ <sup>-</sup> CD3 <sup>-</sup> CD19 <sup>+</sup>                                                              | 5.7 ± 1.9, *                                                                    | 3.8 ± 2.5, NS       | 4.0 ± 2.9, NS |
| T cells                                                                       | Ghost <sup>-</sup> CD45 <sup>+</sup> CD19 <sup>-</sup> TCRβ <sup>+</sup> CD3 <sup>+</sup>                                                              | 6.3 ± 3.2, NS                                                                   | 3.0 ± 2.3, NS       | 6.5 ± 3.2, NS |
| Eosinophils                                                                   | Ghost <sup>-</sup> CD45 <sup>+</sup> SSC <sup>hi</sup> CD19 <sup>-</sup> CD3 <sup>-</sup> CD11b <sup>hi</sup> Ly6G <sup>-</sup> Ly6C <sup>lo</sup>     | 11 ± 4.4, NS                                                                    | 12 ± 4.7, NS        | 8.5 ± 4.7, NS |
| Neutrophils                                                                   | Ghost <sup>-</sup> CD45 <sup>+</sup> SSC <sup>hi</sup> Ly6G <sup>+</sup>                                                                               | 3.0 ± 2.5, NS                                                                   | 3.2 ± 3.8, NS       | 0.3 ± 3.2, NS |
| Ly6C <sup>+</sup> monocytes                                                   | Ghost <sup>-</sup> CD45 <sup>+</sup> CD19 <sup>-</sup> CD4 <sup>-</sup> CD11b <sup>hi</sup> Ly6G <sup>-</sup> Ly6C <sup>+</sup>                        | 4.7 ± 2.5, NS                                                                   | 5.6 ± 2.4, NS       | 1.0 ± 1.8, NS |
| Ly6C <sup>-</sup> monocytes                                                   | Ghost <sup>-</sup> CD45 <sup>+</sup> CD19 <sup>-</sup> CD4 <sup>-</sup> CD11b <sup>hi</sup> Ly6G <sup>-</sup> Ly6C <sup>-</sup>                        | 2.0 ± 2.0, NS                                                                   | 3.5 ± 1.8, NS       | 4.4 ± 1.9, NS |

b

| Effects of repeated PGD <sub>2</sub> injections on CXCR4 expression by splenocytes |                                                                                                                                                        | CXCR4 levels (mean ± s.e.m.) |                  |                 |
|------------------------------------------------------------------------------------|--------------------------------------------------------------------------------------------------------------------------------------------------------|------------------------------|------------------|-----------------|
| Cell type                                                                          | Gating                                                                                                                                                 | PBS                          | PGD <sub>2</sub> |                 |
| Basophils                                                                          | Ghost <sup>-</sup> CD19 <sup>-</sup> TCRβ <sup>-</sup> CD117 <sup>-</sup> CD49b <sup>+</sup> FcεRIα <sup>+</sup> CD123 <sup>+</sup> CD45 <sup>lo</sup> | 3.8 ± 0.2                    | 8.2 ± 1.9        | <i>P</i> < 0.05 |
| B cells                                                                            | Ghost <sup>-</sup> CD45 <sup>+</sup> TCRβ <sup>-</sup> CD3 <sup>-</sup> CD138 <sup>-</sup> CD19 <sup>+</sup>                                           | 10.8 ± 1.0                   | 12.1 ± 0.6       | NS              |
| CD19 <sup>+</sup> CD138 <sup>+</sup> Plasma cells                                  | Ghost <sup>-</sup> CD45 <sup>+</sup> TCRβ <sup>-</sup> CD3 <sup>-</sup> CD19 <sup>+</sup> CD138 <sup>+</sup>                                           | 25.4 ± 1.8                   | 33.2 ± 5.7       | NS              |
| CD19 <sup>-</sup> CD138 <sup>+</sup> Plasma cells                                  | Ghost <sup>-</sup> CD45 <sup>+</sup> TCRβ <sup>-</sup> CD3 <sup>-</sup> CD19 <sup>-</sup> CD138 <sup>+</sup>                                           | 39.4 ± 3.6                   | 37.7 ± 5.2       | NS              |
| Naïve CD4 <sup>+</sup> T cells                                                     | Ghost <sup>-</sup> CD45 <sup>+</sup> CD19 <sup>-</sup> CD3 <sup>+</sup> CD4 <sup>+</sup> CD62L <sup>+</sup> CD44 <sup>-</sup>                          | 37.8 ± 5.1                   | 43.8 ± 4.6       | NS              |
| Effector Memory CD4 <sup>+</sup> T cells                                           | Ghost <sup>-</sup> CD45 <sup>+</sup> CD19 <sup>-</sup> CD3 <sup>+</sup> CD4 <sup>+</sup> CD62L <sup>-</sup> CD44 <sup>+</sup>                          | 51.1 ± 4.3                   | 59.5 ± 5.7       | NS              |
| Central Memory CD4 <sup>+</sup> T cells                                            | Ghost <sup>-</sup> CD45 <sup>+</sup> CD19 <sup>-</sup> CD3 <sup>+</sup> CD4 <sup>+</sup> CD62L <sup>+</sup> CD44 <sup>+</sup>                          | 41.4 ± 5.7                   | 50.3 ± 5.4       | NS              |
| Eosinophils                                                                        | Ghost <sup>-</sup> CD45 <sup>+</sup> SSC <sup>hi</sup> CD19 <sup>-</sup> CD4 <sup>-</sup> CD11b <sup>hi</sup> Ly6G <sup>-</sup> Ly6C <sup>lo</sup>     | 17.5 ± 2.1                   | 22.1 ± 2.9       | NS              |
| Neutrophils                                                                        | Ghost <sup>-</sup> CD45 <sup>+</sup> SSC <sup>hi</sup> Ly6G <sup>+</sup>                                                                               | 17.6 ± 1.3                   | 21.5 ± 1.5       | NS              |
| Ly6C <sup>+</sup> monocytes                                                        | Ghost <sup>-</sup> CD45 <sup>+</sup> CD19 <sup>-</sup> CD4 <sup>-</sup> CD11b <sup>hi</sup> Ly6G <sup>-</sup> Ly6C <sup>+</sup>                        | 36.6 ± 3.9                   | 36.5 ± 5.0       | NS              |
| Ly6C <sup>-</sup> monocytes                                                        | Ghost <sup>-</sup> CD45 <sup>+</sup> CD19 <sup>-</sup> CD4 <sup>-</sup> CD11b <sup>hi</sup> Ly6G <sup>-</sup> Ly6C <sup>-</sup>                        | 19.9 ± 1.5                   | 25.2 ± 2.5       | NS              |

c

| Effects of PTGDR antagonists treatment in <i>Lyn</i> <sup>-/-</sup> on splenocyte proportions |                                                                                                                                                        | Proportion among CD45 <sup>+</sup> living cells (%) (mean ± s.e.m.) |             |                 |
|-----------------------------------------------------------------------------------------------|--------------------------------------------------------------------------------------------------------------------------------------------------------|---------------------------------------------------------------------|-------------|-----------------|
| Cell type                                                                                     | Gating                                                                                                                                                 | Vehicle                                                             | Treated     |                 |
| Basophils                                                                                     | Ghost <sup>-</sup> CD19 <sup>-</sup> TCRβ <sup>-</sup> CD117 <sup>-</sup> CD49b <sup>+</sup> FcεRIα <sup>+</sup> CD123 <sup>+</sup> CD45 <sup>lo</sup> | 0.51 ± 0.05                                                         | 0.29 ± 0.04 | <i>P</i> < 0.05 |
| B cells                                                                                       | Ghost <sup>-</sup> CD45 <sup>+</sup> TCRβ <sup>-</sup> CD3 <sup>-</sup> CD138 <sup>-</sup> CD19 <sup>+</sup>                                           | 7.7 ± 2.3                                                           | 6.2 ± 1.4   | NS              |
| CD19 <sup>+</sup> CD138 <sup>+</sup> Plasma cells                                             | Ghost <sup>-</sup> CD45 <sup>+</sup> TCRβ <sup>-</sup> CD3 <sup>-</sup> CD19 <sup>+</sup> CD138 <sup>+</sup>                                           | 0.56 ± 0.07                                                         | 0.29 ± 0.07 | <i>P</i> < 0.05 |
| CD19 <sup>-</sup> CD138 <sup>+</sup> Plasma cells                                             | Ghost <sup>-</sup> CD45 <sup>+</sup> TCRβ <sup>-</sup> CD3 <sup>-</sup> CD19 <sup>-</sup> CD138 <sup>+</sup>                                           | 0.50 ± 0.12                                                         | 0.55 ± 0.15 | NS              |
| Naïve CD4 <sup>+</sup> T cells                                                                | Ghost <sup>-</sup> CD45 <sup>+</sup> CD19 <sup>-</sup> CD3 <sup>+</sup> CD4 <sup>+</sup> CD62L <sup>+</sup> CD44 <sup>-</sup>                          | 5.6 ± 2.6                                                           | 3.3 ± 1.5   | NS              |
| Effector Memory CD4 <sup>+</sup> T cells                                                      | Ghost <sup>-</sup> CD45 <sup>+</sup> CD19 <sup>-</sup> CD3 <sup>+</sup> CD4 <sup>+</sup> CD62L <sup>-</sup> CD44 <sup>+</sup>                          | 6.8 ± 1.5                                                           | 8.0 ± 1.9   | NS              |
| Central Memory CD4 <sup>+</sup> T cells                                                       | Ghost <sup>-</sup> CD45 <sup>+</sup> CD19 <sup>-</sup> CD3 <sup>+</sup> CD4 <sup>+</sup> CD62L <sup>+</sup> CD44 <sup>+</sup>                          | 3.2 ± 1.8                                                           | 3.4 ± 1.5   | NS              |
| Eosinophils                                                                                   | Ghost <sup>-</sup> CD45 <sup>+</sup> SSC <sup>hi</sup> CD19 <sup>-</sup> CD4 <sup>-</sup> CD11b <sup>hi</sup> Ly6G <sup>-</sup> Ly6C <sup>lo</sup>     | 1.5 ± 0.5                                                           | 0.8 ± 0.3   | NS              |
| Neutrophils                                                                                   | Ghost <sup>-</sup> CD45 <sup>+</sup> SSC <sup>hi</sup> Ly6G <sup>+</sup>                                                                               | 20.4 ± 2.9                                                          | 15.1 ± 2.0  | NS              |
| Ly6C <sup>+</sup> monocytes                                                                   | Ghost <sup>-</sup> CD45 <sup>+</sup> CD19 <sup>-</sup> CD4 <sup>-</sup> CD11b <sup>hi</sup> Ly6G <sup>-</sup> Ly6C <sup>+</sup>                        | 8.7 ± 1.5                                                           | 9.2 ± 1.6   | NS              |
| Ly6C <sup>-</sup> monocytes                                                                   | Ghost <sup>-</sup> CD45 <sup>+</sup> CD19 <sup>-</sup> CD4 <sup>-</sup> CD11b <sup>hi</sup> Ly6G <sup>-</sup> Ly6C <sup>-</sup>                        | 4.3 ± 1.2                                                           | 4.3 ± 0.6   | NS              |

d

| Effects of PTGDR antagonists treatment in <i>Lyn</i> <sup>-/-</sup> on splenocyte CXCR4 expression |                                                                                                                                                        | CXCR4 levels (mean ± s.e.m.) |            |                 |
|----------------------------------------------------------------------------------------------------|--------------------------------------------------------------------------------------------------------------------------------------------------------|------------------------------|------------|-----------------|
| Cell type                                                                                          | Gating                                                                                                                                                 | Vehicle                      | Treated    |                 |
| Basophils                                                                                          | Ghost <sup>-</sup> CD19 <sup>-</sup> TCRβ <sup>-</sup> CD117 <sup>-</sup> CD49b <sup>+</sup> FcεRIα <sup>+</sup> CD123 <sup>+</sup> CD45 <sup>lo</sup> | 13.0 ± 3.8                   | 2.88 ± 0.2 | <i>P</i> < 0.05 |
| B cells                                                                                            | Ghost <sup>-</sup> CD45 <sup>+</sup> TCRβ <sup>-</sup> CD3 <sup>-</sup> CD138 <sup>-</sup> CD19 <sup>+</sup>                                           | 11.70 ± 1.3                  | 11.2 ± 1.5 | NS              |
| CD19 <sup>+</sup> CD138 <sup>+</sup> Plasma cells                                                  | Ghost <sup>-</sup> CD45 <sup>+</sup> TCRβ <sup>-</sup> CD3 <sup>-</sup> CD19 <sup>+</sup> CD138 <sup>+</sup>                                           | 34.8 ± 4.3                   | 37.5 ± 6.1 | NS              |
| CD19 <sup>-</sup> CD138 <sup>+</sup> Plasma cells                                                  | Ghost <sup>-</sup> CD45 <sup>+</sup> TCRβ <sup>-</sup> CD3 <sup>-</sup> CD19 <sup>-</sup> CD138 <sup>+</sup>                                           | 40.0 ± 5.9                   | 39.3 ± 5.4 | NS              |
| Naïve CD4 <sup>+</sup> T cells                                                                     | Ghost <sup>-</sup> CD45 <sup>+</sup> CD19 <sup>-</sup> CD3 <sup>+</sup> CD4 <sup>+</sup> CD62L <sup>+</sup> CD44 <sup>-</sup>                          | 33.8 ± 5.4                   | 30.8 ± 3.0 | NS              |
| Effector Memory CD4 <sup>+</sup> T cells                                                           | Ghost <sup>-</sup> CD45 <sup>+</sup> CD19 <sup>-</sup> CD3 <sup>+</sup> CD4 <sup>+</sup> CD62L <sup>-</sup> CD44 <sup>+</sup>                          | 55.2 ± 4.7                   | 51.1 ± 2.7 | NS              |
| Central Memory CD4 <sup>+</sup> T cells                                                            | Ghost <sup>-</sup> CD45 <sup>+</sup> CD19 <sup>-</sup> CD3 <sup>+</sup> CD4 <sup>+</sup> CD62L <sup>+</sup> CD44 <sup>+</sup>                          | 51.8 ± 3.6                   | 58.1 ± 4.3 | NS              |
| Eosinophils                                                                                        | Ghost <sup>-</sup> CD45 <sup>+</sup> SSC <sup>hi</sup> CD19 <sup>-</sup> CD4 <sup>-</sup> CD11b <sup>hi</sup> Ly6G <sup>-</sup> Ly6C <sup>lo</sup>     | 21.4 ± 2.2                   | 18.9 ± 1.0 | NS              |
| Neutrophils                                                                                        | Ghost <sup>-</sup> CD45 <sup>+</sup> SSC <sup>hi</sup> Ly6G <sup>+</sup>                                                                               | 24.8 ± 2.8                   | 27.0 ± 3.6 | NS              |
| Ly6C <sup>+</sup> monocytes                                                                        | Ghost <sup>-</sup> CD45 <sup>+</sup> CD19 <sup>-</sup> CD4 <sup>-</sup> CD11b <sup>hi</sup> Ly6G <sup>-</sup> Ly6C <sup>+</sup>                        | 41.1 ± 7.4                   | 36.0 ± 1.7 | NS              |
| Ly6C <sup>-</sup> monocytes                                                                        | Ghost <sup>-</sup> CD45 <sup>+</sup> CD19 <sup>-</sup> CD4 <sup>-</sup> CD11b <sup>hi</sup> Ly6G <sup>-</sup> Ly6C <sup>-</sup>                        | 26.0 ± 2.1                   | 22.9 ± 1.5 | NS              |

Supplementary Table 2: Effects of ex vivo PTGDRs agonists, in vivo PGD<sub>2</sub> injections and PTGDRs antagonists treatment on other splenocytes

(a) CXCR4 level variations (%) on the surface of the indicated WT splenocytes incubated ex vivo for 24 hours with 1 μM of the indicated compound as compared to the vehicle control condition (*n* = 7 to 14). (b) CXCR4 levels on the indicated splenocytes from *Lyn*<sup>-/-</sup> mice as in **Supplementary Fig. 6a-f**. (c) Proportions of the indicated cell type among CD45<sup>+</sup> splenocytes from aged *Lyn*<sup>-/-</sup> mice treated or not (vehicle) with PTGDRs antagonists as in **Fig. 6** and **7**. (d) CXCR4 levels on the indicated splenocytes from mice as in (b). (a) Statistical analyses were by one-way ANOVA followed by Dunnett's multiple comparisons test to the vehicle condition. (b,c,d) Statistical analyses were by unpaired Student t test. \*: *P* < 0.05, \*\*: *P* < 0.01, NS: not significant.

Supplementary Table 3. Antibodies used.

| Fluorophore | Target            | Isotype     | Clone       | Manufacturer   | Fluorophore | Target         | Isotype     | Clone      | Manufacturer     | Fluorophore      | Target          | Isotype      | Clone          | Manufacturer   | Isotype     | Clone          | Manufacturer   |
|-------------|-------------------|-------------|-------------|----------------|-------------|----------------|-------------|------------|------------------|------------------|-----------------|--------------|----------------|----------------|-------------|----------------|----------------|
| AF488       | Human CD197       | Mouse IgG2a | TG8/CCR7    | BioLegend      | BV510       | Isotype        | Rat IgG2b   | RTK4530    | BioLegend        | PE               | Isotype         | Mouse IgG2b  | MPC-11         | BioLegend      | Mouse IgG2b | MPC-11         | BioLegend      |
| AF488       | Isotype           | Mouse IgG2a | MOPC-173    | BioLegend      | BV605       | HLA-DR         | Mouse IgG2a | L243       | BioLegend        | PE               | Human CD181     | Mouse IgG2b  | 8F1/CXCR1      | BioLegend      | Mouse IgG2b | 8F1/CXCR1      | BioLegend      |
| AF488       | Isotype           | Mouse IgG2b | 133303      | R&D systems    | BV605       | Isotype        | Mouse IgG2a | MOPC-173   | BioLegend        | PE               | Mouse CD4       | Rat IgG2a    | RM4-5          | BioLegend      | Rat IgG2a   | RM4-5          | BioLegend      |
| AF488       | Human CCR2        | Mouse IgG2b | 48607       | R&D systems    | BV605       | Isotype        | Mouse IgG2b | MPC-11     | BioLegend        | PE               | Mouse CD19      | Rat IgG2a    | 6D5            | BioLegend      | Rat IgG2a   | 6D5            | BioLegend      |
| AF647       | Mouse FcεR1α      | AH IgG      | MAR1        | BioLegend      | BV605       | Human CD193    | Mouse IgG2b | 5E8        | BioLegend        | PE               | Isotype         | Rat IgG2a    | RTK2758        | BioLegend      | Rat IgG2a   | RTK2758        | BioLegend      |
| AF647       | Isotype           | AH IgG      | HTK888      | BioLegend      | BV605       | Mouse F4/80    | Rat IgG2a   | BM8        | BioLegend        | PE               | Mouse CD123     | Rat IgG2a    | 5B11           | BioLegend      | Rat IgG2a   | 5B11           | BioLegend      |
| AF647       | Isotype           | Mouse IgG2a | MOPC-173    | BioLegend      | BV605       | Isotype        | Rat IgG2a   | RTK2758    | BioLegend        | PE               | Mouse CD117     | Rat IgG2b    | 2B8            | BioLegend      | Rat IgG2b   | 2B8            | BioLegend      |
| AF647       | HLA-DR            | Mouse IgG2a | L243        | BioLegend      | BV605       | Mouse CD3      | Rat IgG2b   | 17A2       | BioLegend        | PE               | Isotype         | Rat IgG2b    | RTK4530        | BioLegend      | Rat IgG2b   | RTK4530        | BioLegend      |
| AF647       | Human CD197       | Mouse IgG2a | G043H7      | BioLegend      | BV605       | Isotype        | Rat IgG2b   | RTK4530    | BioLegend        | PE               | Mouse Ly6C/Ly6G | Rat IgG2b    | R86-8C5        | BioLegend      | Rat IgG2b   | R86-8C5        | BioLegend      |
| AF647       | Human CD191       | Mouse IgG2b | TG4/CCR1    | BioLegend      | BV785       | Mouse CD11c    | AH IgG      | N418       | BioLegend        | PE               | Mouse Ly6C      | Rat IgG2c    | HK1.4          | BioLegend      | Rat IgG2c   | HK1.4          | ebioscience    |
| AF647       | Isotype           | Mouse IgG2b | MOPC-173    | BioLegend      | BV785       | Isotype        | AH IgG      | HTK888     | BioLegend        | PE/Cy7           | Isotype         | Mouse IgG1   | MOPC-21        | BioLegend      | Mouse IgG1  | MOPC-21        | BioLegend      |
| AF647       | Human CD294       | Rat IgG2a   | BM16        | BioLegend      | BV785       | Human CCR6     | Mouse IgG2b | G034E3     | BioLegend        | PE/Cy7           | Human CD11b     | Mouse IgG1   | ICRF44         | BioLegend      | Mouse IgG1  | ICRF44         | BioLegend      |
| AF647       | Isotype           | Rat IgG2a   | RTK2758     | BioLegend      | BV785       | Mouse CD44     | Rat IgG2b   | IM7        | BioLegend        | PE/Cy7           | Isotype         | Mouse IgG2a  | MOPC-173       | BioLegend      | Mouse IgG2a | MOPC-173       | BioLegend      |
| AF700       | HLA-DR            | Mouse IgG2a | L243        | BioLegend      | BV785       | Isotype        | Rat IgG2b   | RTK4530    | BioLegend        | PE/Cy7           | HLA-DR          | Mouse IgG2a  | L243           | BioLegend      | Mouse IgG2a | L243           | BioLegend      |
| AF700       | Isotype           | Mouse IgG2a | MOPC-173    | BioLegend      | FITC        | Isotype        | AH IgG      | HTK888     | BioLegend        | PE/Cy7           | Human FcεR1α    | Mouse IgG2b  | MPC-11         | BioLegend      | Mouse IgG2b | MPC-11         | BioLegend      |
| AF700       | Human CXCR2       | Mouse IgG2a | 48311       | R&D systems    | FITC        | Mouse CD49b    | AH IgG      | HMO2       | BioLegend        | PE/Cy7           | Isotype         | Human FcεR1α | AER-37 (GRA-1) | BioLegend      | Mouse IgG2b | AER-37 (GRA-1) | BioLegend      |
| AF700       | Human CD195       | Rat IgG2a   | HEK/1/85a   | BioLegend      | FITC        | Isotype        | Mouse IgG1  | MOPC-21    | BioLegend        | PE/Cy7           | Mouse CD19      | Rat IgG2a    | 6D5            | BioLegend      | Rat IgG2a   | 6D5            | BioLegend      |
| AF700       | Isotype           | Rat IgG2a   | RTK2758     | BioLegend      | FITC        | Human CD63     | Mouse IgG1  | H5C6       | BioLegend        | PE/Cy7           | Isotype         | Rat IgG2a    | RTK2758        | BioLegend      | Rat IgG2a   | RTK2758        | BioLegend      |
| AF700       | Mouse Ly6C/Ly6G   | Rat IgG2b   | R86-8C5     | BioLegend      | FITC        | Human CD303    | Mouse IgG1  | AC144      | Miltenyi Biotec  | PE/Cy7           | Mouse CD117     | Rat IgG2b    | 2B8            | BioLegend      | Rat IgG2b   | 2B8            | BioLegend      |
| AF700       | Isotype           | Rat IgG2b   | RTK4530     | BioLegend      | FITC        | Isotype        | Mouse IgG1  | I55-21F5   | Miltenyi Biotec  | PE/Cy7           | Mouse CD45      | Rat IgG2b    | 30-F11         | BioLegend      | Rat IgG2b   | 30-F11         | BioLegend      |
| AF700       | Mouse Iα/IE       | Rat IgG2b   | M5/114.15.2 | BioLegend      | FITC        | Human CD164    | Mouse IgG1  | 67D2       | BioLegend        | PE/Cy7           | Isotype         | Rat IgG2b    | RTK4530        | BioLegend      | Rat IgG2b   | RTK4530        | BioLegend      |
| APC         | Isotype           | AH IgG      | HTK888      | BioLegend      | FITC        | HLA-DR         | Mouse IgG2a | L243       | BioLegend        | PE-CF594         | Isotype         | Mouse IgG2a  | G155-178       | BD biosciences | Mouse IgG2a | G155-178       | BD biosciences |
| APC         | Mouse FcεR1α      | AH IgG      | MAR1        | BioLegend      | FITC        | Isotype        | Rat IgG2a   | RTK2758    | BioLegend        | PE-CF594         | Human CD123     | Mouse IgG2a  | 7G3            | BD biosciences | Mouse IgG2a | 7G3            | BD biosciences |
| APC         | Human TSLPR       | Mouse IgG1  | 1B4         | BioLegend      | FITC        | Mouse Ly6G     | Rat IgG2a   | 1A8        | BioLegend        | PE-CF594         | Mouse CD11b     | Rat IgG2b    | M1/70          | BD biosciences | Rat IgG2b   | M1/70          | BD biosciences |
| APC         | Isotype           | Mouse IgG1  | MOPC-21     | BioLegend      | FITC        | Mouse C3       | Goat        | Polyclonal | Cedarlane        | PE-eFluor610     | Isotype         | Rat IgG2b    | eB149/10H5     | ebioscience    | Rat IgG2b   | eB149/10H5     | ebioscience    |
| APC         | Isotype           | Rat IgG2a   | RTK2758     | BioLegend      | FITC        | Mouse IgG      | Goat        | Polyclonal | Sigma-Aldrich    | PE-eFluor610     | Mouse CD184     | Rat IgG2b    | 2B11           | ebioscience    | Rat IgG2b   | 2B11           | ebioscience    |
| APC         | Mouse CD138       | Rat IgG2a   | 281-2       | BD biosciences | FITC        | Isotype        | Mouse IgG   | Polyclonal | Southern biotech | PerCP/Cy5.5      | Human CD123     | Mouse IgG1   | 6H6            | BioLegend      | Mouse IgG1  | 6H6            | BioLegend      |
| APC         | Mouse Ly-66/Ly-6C | Rat IgG2b   | R86-8C5     | BioLegend      | FITC        | Isotype        | Mouse CD4   | Goat       | Polyclonal       | PerCP/Cy5.5      | Isotype         | Mouse IgG1   | MOPC-21        | BioLegend      | Mouse IgG1  | MOPC-21        | BioLegend      |
| APC/Cy7     | Isotype           | Rat IgG2b   | RTK4530     | BioLegend      | PB          | Isotype        | Mouse CD4   | Goat       | Polyclonal       | PerCP/Cy5.5      | Human CD184     | Mouse IgG1   | MOPC-173       | BioLegend      | Mouse IgG2a | MOPC-173       | BioLegend      |
| APC/Cy7     | Mouse TCRβ        | AH IgG      | H57-597     | BioLegend      | PE          | Isotype        | Mouse CD4   | RTK2758    | BioLegend        | PerCP/Cy5.5      | Human CD184     | Mouse IgG2a  | 1ZG5           | BioLegend      | Mouse IgG2a | 1ZG5           | BioLegend      |
| APC/Cy7     | Isotype           | Mouse IgG1  | HTK888      | BioLegend      | PE          | Mouse CD11c    | AH IgG      | N418       | BioLegend        | PerCP/Cy5.5      | Human CD11b     | Rat IgG2b    | M1/70          | BioLegend      | Mouse IgG2a | M1/70          | BioLegend      |
| APC/Cy7     | Isotype           | Mouse IgG1  | MOPC-21     | BioLegend      | PE          | Mouse TCRβ     | AH IgG      | H57-597    | BioLegend        | PerCP/Cy5.5      | Mouse CD11b     | Rat IgG2b    | RTK4530        | BioLegend      | Rat IgG2b   | RTK4530        | BioLegend      |
| APC/Cy7     | Human CD62L       | Mouse IgG1  | DREG-56     | BioLegend      | PE          | Mouse FcεR1α   | AH IgG      | MAR1       | BioLegend        | PerCP/Cy5.5      | Isotype         | Rat IgM      | DX5            | BioLegend      | Rat IgM     | DX5            | BioLegend      |
| APC/Cy7     | Mouse CD19        | Rat IgG2a   | 6D5         | BioLegend      | PE          | Isotype        | AH IgG      | HTK888     | BioLegend        | PerCP/Cy5.5      | Mouse CD49b     | Rat IgM      | DX5            | BioLegend      | Rat IgM     | DX5            | BioLegend      |
| APC/Cy7     | Isotype           | Rat IgG2a   | RTK2758     | BioLegend      | PE          | Human CD89     | Mouse IgG1  | A59        | BioLegend        | PerCP/Cy5.5      | Isotype         | Rat IgM      | RTK2118        | BioLegend      | Rat IgM     | RTK2118        | BioLegend      |
| APC/Cy7     | Mouse CD117       | Rat IgG2b   | 2B8         | BioLegend      | PE          | Human CD182    | Mouse IgG1  | 5E8/CXCR2  | BioLegend        | PerCP/Cy5.5      | Mouse CD117     | Rat IgG2b    | 2B8            | BioLegend      | Rat IgG2b   | 2B8            | BioLegend      |
| APC/Cy7     | Isotype           | Rat IgG2b   | RTK4530     | BioLegend      | PE          | Human CD19     | Mouse IgG1  | HIB19      | BioLegend        | PerCP/eFluor 710 | Human CD303a    | Mouse IgG2a  | 201A           | ebioscience    | Mouse IgG2a | 201A           | ebioscience    |
| BV421       | Isotype           | AH IgG      | HTK888      | BioLegend      | PE          | Human CD3      | Mouse IgG1  | UCHT1      | BioLegend        | PerCP/eFluor 710 | Isotype         | Mouse IgG2a  | ND             | ebioscience    | Mouse IgG2a | ND             | ebioscience    |
| BV421       | Mouse CD3ε        | AH IgG      | 145-2C11    | BioLegend      | PE          | Isotype        | Mouse IgG1  | MOPC-21    | BioLegend        | PerCP/eFluor 710 | Human TSLPR     | Mouse IgG2a  | 1A6            | ebioscience    | Mouse IgG2a | 1A6            | ebioscience    |
| BV421       | CD203c            | Mouse IgG1  | NP4D6       | BioLegend      | PE          | Isotype        | Mouse IgG2a | MOPC-173   | BioLegend        | PerCP/eFluor 710 | Mouse CD184     | Rat IgG2b    | 2B11           | ebioscience    | Rat IgG2b   | 2B11           | ebioscience    |
| BV421       | Isotype           | Mouse IgG1  | MOPC-21     | BioLegend      | PE          | Human CD303    | Mouse IgG2a | 201A       | BioLegend        | PerCP/eFluor 710 | Isotype         | Rat IgG2b    | ND             | ebioscience    | Rat IgG2b   | ND             | ebioscience    |
| BV510       | Mouse Iα/IE       | Rat IgG2b   | M5/114.15.2 | BioLegend      | PE          | Rabbit IgG     | Goat        | Polyclonal | R&D systems      | -                | H-PGDS          | Rabbit       | Polyclonal     | Aviva          | Rabbit      | Polyclonal     | Aviva          |
|             |                   |             |             |                | PE          | Human Leptin R | Mouse IgG2b | 52263      | R&D systems      | -                | Syk             | Rabbit       | Polyclonal     | Biosystems     | Rabbit      | Polyclonal     | Biosystems     |
|             |                   |             |             |                | PE          |                |             |            |                  |                  |                 |              |                | Santa Cruz     |             |                | Santa Cruz     |
|             |                   |             |             |                |             |                |             |            |                  |                  |                 |              |                | Biotechnology  |             |                | Biotechnology  |

Abbreviations used : AF: Alexa Fluor, AH: Armenian Hamster, APC: Allophycocyanin, BV: Brilliant Violet, Cy: Cyanin, CD: cluster of differentiation, FITC: Fluorescein Isothiocyanate, PE: Phycoerythrin, PerCP: Peridinin Chlorophyll Protein Complex, PB: Pacific blue, ND: Not determined
